# Supplementary material
Source: PubMed Central journal article supplement (PMC3694759)
Supplement: NIHMS464512-supplement-05.pdf [file NIHMS464512-supplement-05.pdf]

Supplementary Table 1  
Crabbe et al.

Number of nuclei, telomeres and centromeres used for quantification figures 2C and 4F

|                |         | EXP 1  |      |     | EXP 2  |      |     | EXP 3  |     |     |
|----------------|---------|--------|------|-----|--------|------|-----|--------|-----|-----|
|                |         | Nuclei | Tel  | Cen | Nuclei | Tel  | Cen | Nuclei | Tel | Cen |
| <b>Fig.2C</b>  | G1      | 13     | 331  | 185 | 19     | 610  | /   | 34     | 787 | 435 |
|                | S       | 13     | 538  | 241 | 26     | 1068 | /   | 23     | 866 | 472 |
|                | Next G1 | 16     | 915  | 478 | 21     | 1238 | /   | 39     | 821 | 411 |
| <b>Fig. 4F</b> | shSCB   | 27     | 1031 | /   | 32     | 1039 | /   |        |     |     |
|                | shRAP1  | 33     | 1391 | /   | 38     | 1582 | /   |        |     |     |

Supplementary Table 2  
Crabbe et al.

## List of primers used in this study

|                             |                                                                                 |
|-----------------------------|---------------------------------------------------------------------------------|
| BamHI-EGFP-For              | 5'-GGCGGATCCATGGTGAGCAAGGGCGAGG-3'                                              |
| BamHI-EGFP-Rev              | 5'-GGCGGATCCGGTGGCGATGCTGCGCTTGTACAGCTCGTCCATGCCG-3'                            |
| EcoRI-NLS-EGFP-For          | 5'-GGCGAATTCATGCCAGAACCACCTAAGAAGAAGCGCAAGGTCGAAGATGCAGCAGTGAGCAAGGGCGAGGAGG-3' |
| XhoI-EGFP-Rev               | 5'-GGCCTCGAGTTACTTGTACAGCTCGTCCATGCC-3'                                         |
| XhoI-H2B-For                | 5'-CGGCTCGAGATGCCAGAGCCAGCGAAGTCTGC-3'                                          |
| BamHI-mCherry-Rev           | 5'-CGGGGATCCTTACTTGTACAGCTCGTCCATGCC-3'                                         |
| attB1-Sun1 $\Delta$ 200-For | 5'-GGGGACAAGTTTGTACAAAAAAGCAGGCTTCATGGTTAGTATCAACCACGTGTCAAGG-3'                |
| attB2-Sun1-Rev              | 5'-GGGGACCACTTTGTACAAGAAAGCTGGGTCCCTTGACAGGTTCGCCATGAACTC-3'                    |
